# Supplementary material for: Visible-light-responsive copper(ii) borate photocatalysts with intrinsic midgap states for water splitting
Source: Royal Society of Chemistry journal article supplement (doi:10.1039/c2ta00522k), 2012-12-18
Supplement: c2ta00522k.pdf [file c2ta00522k.pdf]

## Supporting Information

### **Visible-light-responsive Copper (II) Borate Photocatalysts with Intrinsic Midgap States for Water Splitting**

Jikai Liu,<sup>‡</sup> Shuhao Wen,<sup>‡</sup> Xiaoxin Zou, Fan Zuo, Gregory Beran\* and Pingyun Feng\*

Department of Chemistry, University of California, Riverside, California 92521

Email: pingyun.feng@ucr.edu and gregory.beran@ucr.edu

### Synthesis method:

All chemicals, including boric acid (Acros, 99+%), boron oxide (City Chemical, 99.9%), copper (□) nitrate trihydrate (Acros, for analysis), copper (II) oxide (Sigma-Aldrich, 99.99%), iron (III) oxide (Alfa Aesar, 99.5%), sodium nitrate (Alfa Aesar, 99%) were used as received without any further purification.

A typical synthetic procedure of  $\text{CuB}_2\text{O}_4$  can refer to a previous report.<sup>1</sup> First,  $\text{H}_3\text{BO}_3$ ,  $\text{Cu}(\text{NO}_3)_2 \cdot 3\text{H}_2\text{O}$ , and  $\text{NaNO}_3$  at a molar ratio of 1:10:0.02 were dissolved in distilled water. The solution was slowly evaporated to dryness on a hot plate with constant stirring. The dry mixture was heated at 500 °C for 5 h. The resultant mixture was ground thoroughly and heated at 800 °C for 12 h. The product was washed with a large amount of warm distilled water to remove excess  $\text{B}_2\text{O}_3$  and then dry at 70 °C overnight. The final product was ground before characterization and property measurements.

A typical synthetic procedure of  $\text{Cu}_3\text{B}_2\text{O}_6$  can refer to a previous report<sup>2</sup> with minor changes. A nearly stoichiometric mixture of  $\text{CuO}$  and  $\text{B}_2\text{O}_3$  (3% excess  $\text{B}_2\text{O}_3$ ) was heated in air at 900 °C for 36 h, with two intermediate grindings. The product was washed with a large amount of warm distilled water and then dried at 70 °C overnight. The final product was ground before characterization and property measurements.

### Instrumental characterization:

Powder X-ray diffraction data were collected using a Bruker D8-Advance powder diffractometer operating at 40kV, 40mA for Cu  $\text{K}\alpha$  radiation ( $\lambda=1.5406 \text{ \AA}$ ). The pure  $\text{Al}_2\text{O}_3$  was used as the internal standard to allow for accurate measurement of the peak positions (i.e.  $2\theta$  values) which might be shifted due to various experimental or instrumental factors such as the height of the sample surface.

The UV-visible absorption spectra were recorded on a Shimadzu UV-3101PC UV-Vis-NIR spectrophotometer operating in the diffuse mode with application of Kubelka-Munk equation. SEM pictures were recorded on a Philips XL30 scanning electron microscope. A thin layer of Au/Pd was sprayed onto the sample before measurement.

The specific surface area was calculated using the BET (Brunauer-Emmett-Teller) method from the nitrogen adsorption data in the relative range ( $P/P_0$ ) of 0.04-0.20.

The ESR spectra were obtained on a JES-FA 200 ESR spectrometer at room temperature.

The X-ray photoelectron spectroscopy (XPS) characterization was carried out by using a Kratos AXIS ULTRADLD XPS system equipped with an Al K monochromated X-ray source and a 165-mm electron energy hemispherical analyzer to examine the surface properties and composition of the sample. All the binding energies were calibrated by using the contaminant carbon (C 1s) 284.6 eV as a reference.

### Photocatalysis experiments:

Photocatalytic  $\text{H}_2$  and  $\text{O}_2$  production experiments were conducted in a sealed circulation system. For  $\text{H}_2$  evolution, 1 wt% Pt was loaded as cocatalysts by UV irradiation of  $\text{PtCl}_4$  aqueous solution. In a typical run, 0.100 g of sample was suspended in 120 mL 25% methanol aqueous solution (containing 0.0017 g  $\text{PtCl}_4$ ) under magnetic stirring. Then a 300 W Xe lamp was applied to this mixture for 30 minutes, in that case, Pt nanoparticles would be loaded to the surface of  $\text{CuB}_2\text{O}_4$  as cocatalysts. After degassing the system for about half an hour, this

300 W Xe lamp with a 400 nm cut-on filter (Newport Corp.) was applied to execute the photocatalytic reaction. For O<sub>2</sub> evolution, 1 wt% RuO<sub>2</sub> was loaded by impregnation from a carbonyl complex, Ru<sub>3</sub>(CO)<sub>12</sub> (Aldrich, 99.0%), in acetone solution according to the method reported previously.<sup>3</sup> In a typical run, 0.100 g RuO<sub>2</sub>-photocatalysts was suspended in 120 mL 0.05 M AgNO<sub>3</sub> aqueous solution containing 0.2 g La<sub>2</sub>O<sub>3</sub> as a base buffer to maintain the pH at ~8.08. After degassing the system for about half an hour, the 300 W Xe lamp with a 400 nm cut-on filter was applied to execute the photocatalytic reaction. The products of H<sub>2</sub> and O<sub>2</sub> were analyzed by gas chromatography (Shimadzu GC-8A) equipped with a thermal conductivity detector (TCD). All the photocatalysis experiments were repeated for three times at least.

To confirm the H<sub>2</sub> is coming from the photocatalytic reaction, the amount of H<sub>2</sub> we actually collected must exceed the amount of photocatalysts we used in the experiment (Turnover number > 1). To facilitate the measurements, H<sub>2</sub> was collected by illuminating the reaction under UV irradiation.<sup>4</sup> For CuB<sub>2</sub>O<sub>4</sub>, we collected 702.4 μmol of H<sub>2</sub> under UV irradiation (0.13 W/cm<sup>2</sup>) for 116 hours, which exceeds the amount of CuB<sub>2</sub>O<sub>4</sub> (0.1 g, 670.4 μmol) used in the experiment. During 116 hours irradiation under UV light, H<sub>2</sub> was steadily produced, which actually further verifies the photostability of the compound. Since Cu<sub>3</sub>B<sub>2</sub>O<sub>6</sub> appears much slower H<sub>2</sub> evolution rate than CuB<sub>2</sub>O<sub>4</sub>, in order to shorten the measurement period, we increased the light intensity to 1.66 W/cm<sup>2</sup> when performing its turnover number measurement. After 52 hours irradiation, we collected 3781.4 μmol of H<sub>2</sub>, which exceeds the amount of Cu<sub>3</sub>B<sub>2</sub>O<sub>6</sub> (0.1 g, 324.39 μmol) used in the experiment. H<sub>2</sub> was steadily produced during the measurement which also further indicates the photostability of the compound.

The apparent quantum yield (AQY) was calculated based on the following equations: AQY of H<sub>2</sub> evolution = 100% × [(number of evolved H<sub>2</sub> molecules) × 2] / (number of incident photons); AQY of O<sub>2</sub> evolution = 100% × [(number of evolved O<sub>2</sub> molecules) × 4] / (number of incident photons). A bandpass filter (Newport Corp.) with various wavelengths from 300 nm to 700 nm was applied. The number of the incident photons was determined using a radiant power energy meter (Newport Corp., Model 70260 with a Thermopile Detector).

Table S1. Apparent Quantum Yield of CuB<sub>2</sub>O<sub>4</sub> at different wavelengths

| Wavelength            | 300 nm | 420 nm | 500 nm | 600 nm | 700 nm |
|-----------------------|--------|--------|--------|--------|--------|
| AQY of H <sub>2</sub> | 0.67%  | 0.06%  | 0.045% | 0.034% | 0%     |
| AQY of O <sub>2</sub> | 10.6%  | 6.39%  | 3.74%  | 1.3%   | 0%     |

#### Control photocatalysis experiments:

First, set up a H<sub>2</sub> evolution trial according to the above experimental conditions for H<sub>2</sub> evolution measurement and wrap the reactor with aluminum foils thoroughly. Sample the system every two hours, re-vacuum the system and sample it again in a two hours interval. Second, set up an O<sub>2</sub> evolution trial according to the above experimental conditions for O<sub>2</sub> evolution measurement and wrap the reactor with aluminum foils thoroughly. Sample the system in the same interval as it is used for O<sub>2</sub> evolution experiment above. In control experiments, only trace amount of H<sub>2</sub> or O<sub>2</sub> were observed, indicating the H<sub>2</sub> and O<sub>2</sub> obtained under visible light irradiation were not from the mechano-catalytic water splitting.

To further verify the copper borates do perform photocatalytic water splitting, we illuminated 25% aqueous methanol solution and 0.05 M AgNO<sub>3</sub> aqueous solution containing 0.2 g La<sub>2</sub>O<sub>3</sub>

respectively without adding any copper borates. No H<sub>2</sub> or O<sub>2</sub> was tested.

#### Density of states (DOS) calculation:

The DOS calculations were performed using the plane-wave-based DFT code, VASP,<sup>5</sup> via the projector-augmented wave method to describe core electrons.<sup>6</sup> The unit cells were sampled with an 8 x 8 x 16 k-point for CuB<sub>2</sub>O<sub>4</sub> and an 18 x 2 x 2 k-point for Cu<sub>3</sub>B<sub>2</sub>O<sub>6</sub>. Wave functions were expanded by the plane waves up to a cutoff energy of 400 eV. We performed the calculations using the LSDA functional of Ceperley and Alder, parameterized by Perdew and Zunger, and the LSDA+U method implemented by Dudarev and co-workers.<sup>7</sup> We chose the parameters of U(Cu)=7.5 eV, J(Cu)=0.98 eV for CuB<sub>2</sub>O<sub>4</sub> and U(Cu)=6.0 eV, J(Cu)=0.98 eV for Cu<sub>3</sub>B<sub>2</sub>O<sub>6</sub> respectively. The first set has been used on similar copper compounds previously (see Reference 5 in the main article), and the predicted population maximum of the midgap state in CuB<sub>2</sub>O<sub>4</sub> agrees well with the experimental d-d transition peak maximum. The Cu<sub>3</sub>B<sub>2</sub>O<sub>6</sub> parameters were chosen to shift the midgap state population maximum to the energy corresponding to the experimental d-d transition peak maximum in that material as well.

Optimized crystal geometry compared with experimental results (in parentheses)

|            | CuB <sub>2</sub> O <sub>4</sub> | Cu <sub>3</sub> B <sub>2</sub> O <sub>6</sub> |
|------------|---------------------------------|-----------------------------------------------|
| a (Å)      | 11.499(11.480)                  | 3.30397(3.35300)                              |
| b (Å)      | 11.499 (11.480)                 | 19.7983(19.6650)                              |
| c (Å)      | 5.6049(5.6200)                  | 19.7672(19.6270)                              |
| α (degree) | 90.000 (90.000)                 | 88.9970(88.7700)                              |
| β (degree) | 90.000 (90.000)                 | 69.6042(69.7100)                              |
| γ (degree) | 90.000 (90.000)                 | 69.3382(69.2400)                              |
| V          | 741.158 (741.178)               | 1125.44(1127.41)                              |
| density    | 4.01031(4.01020)                | 4.54812(4.54019)                              |

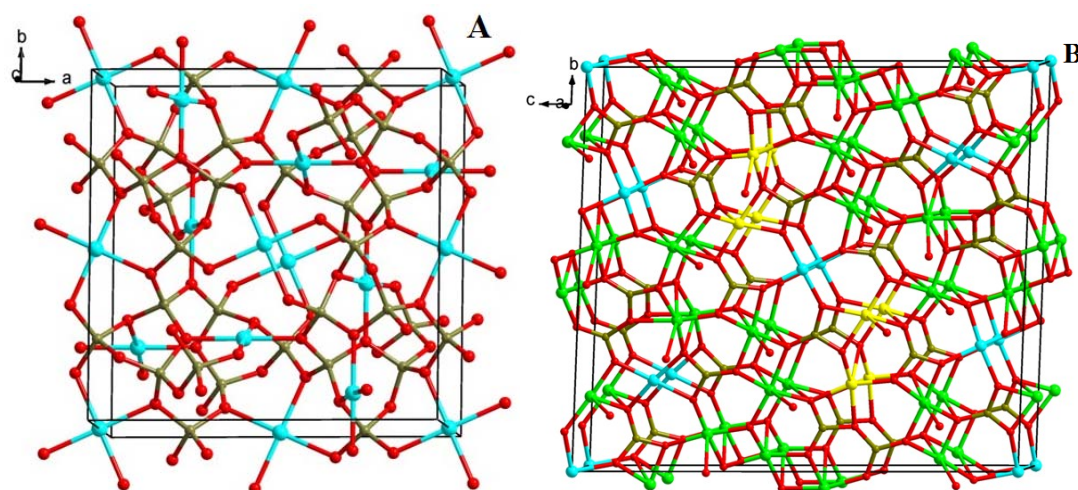

**Figure S1:** Unit cell portions of the crystal structures of CuB<sub>2</sub>O<sub>4</sub> (A) and Cu<sub>3</sub>B<sub>2</sub>O<sub>6</sub> (B). The color code is as follows: oxygen (red); boron (dark yellow); copper in square (cyan), pyramidal (yellow) and octahedral (green) geometry. Some of the Cu atoms in CuB<sub>2</sub>O<sub>4</sub> are coordinated as distorted octahedron due to Jahn-Teller effect.

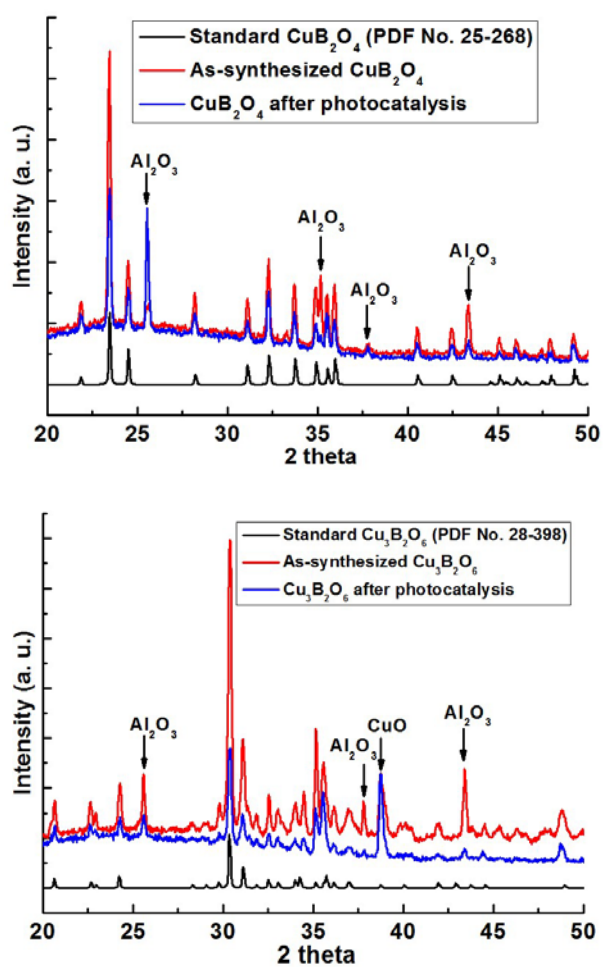

**Figure S2:** XRD patterns of  $\text{CuB}_2\text{O}_4$  and  $\text{Cu}_3\text{B}_2\text{O}_6$

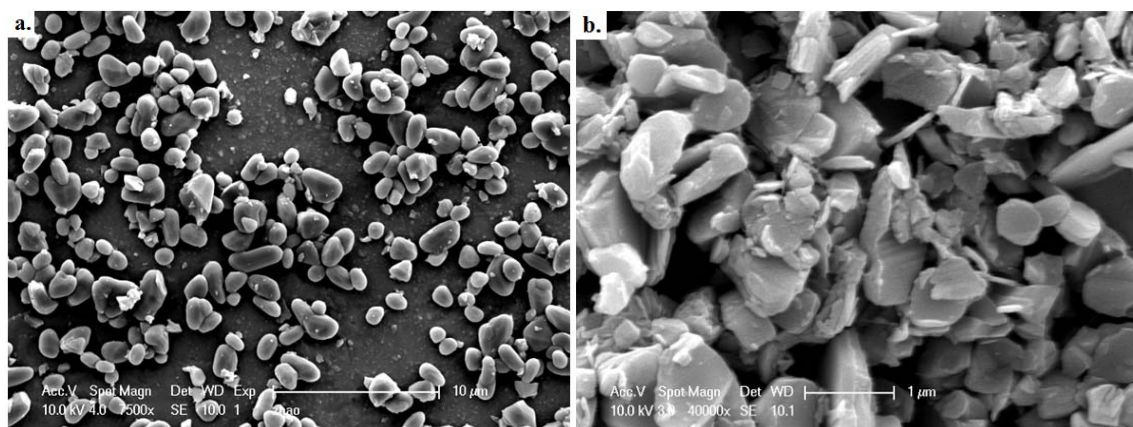

**Figure S3:** SEM pictures of prepared (a)  $\text{CuB}_2\text{O}_4$  and (b)  $\text{Cu}_3\text{B}_2\text{O}_6$ .



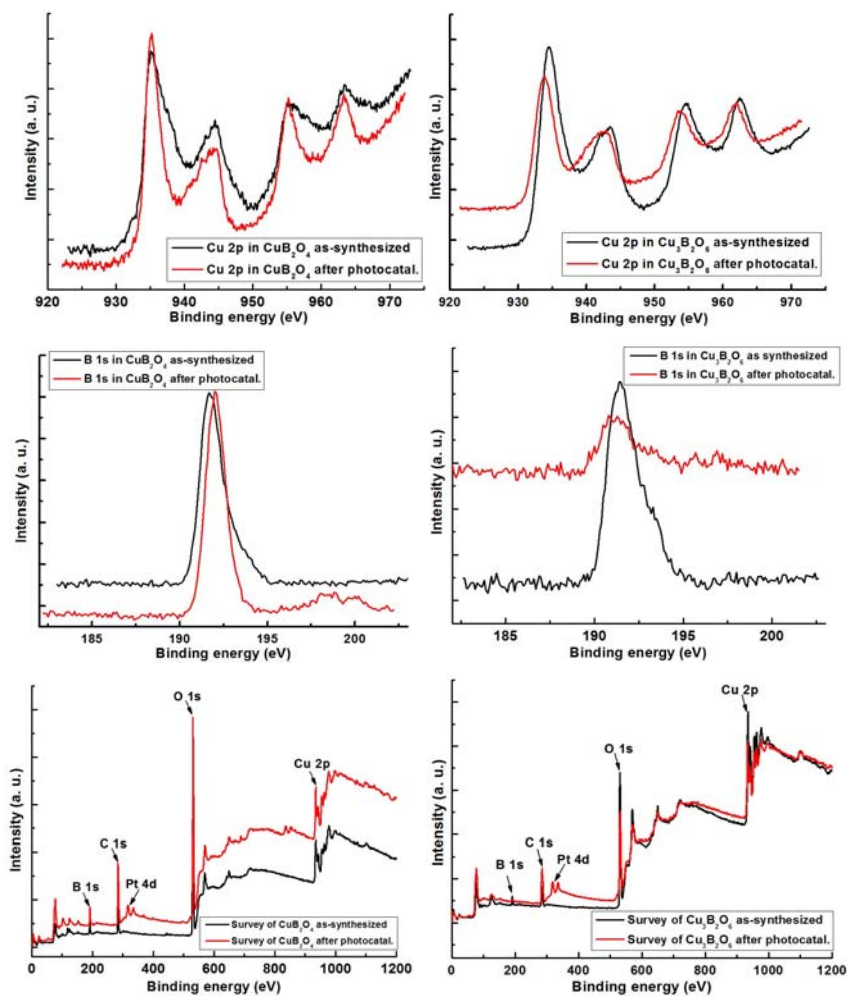

**Figure S4:** XPS spectra of copper borates before and after  $\text{H}_2$  evolution reaction

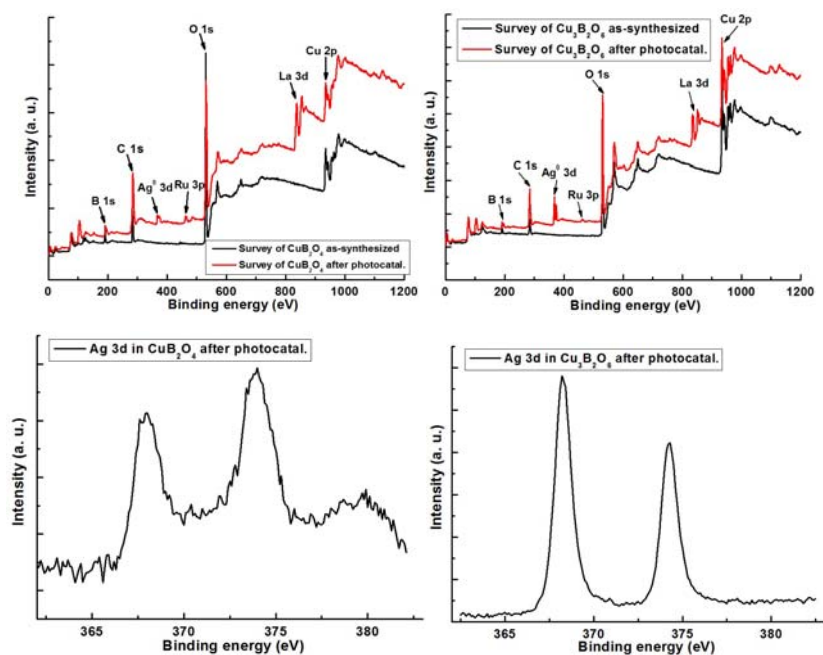

**Figure S5:** XPS spectra of copper borates before and after  $\text{O}_2$  evolution reaction (bottom: highly resolved XPS spectra of Ag 3d after  $\text{O}_2$  evolution reaction)

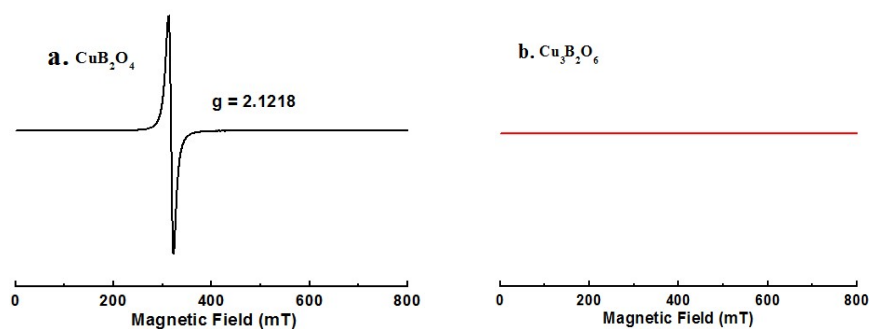

**Figure S6:** The ESR spectra of (a)  $\text{CuB}_2\text{O}_4$  and (b)  $\text{Cu}_3\text{B}_2\text{O}_6$  at room temperature

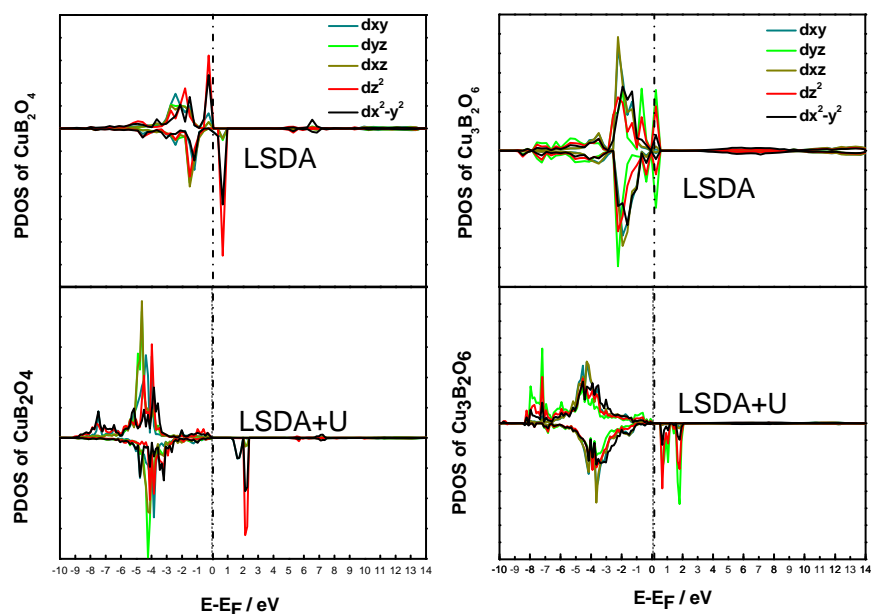

**Figure S7:** The comparison of the PDOS with LSDA and LSDA+U calculations

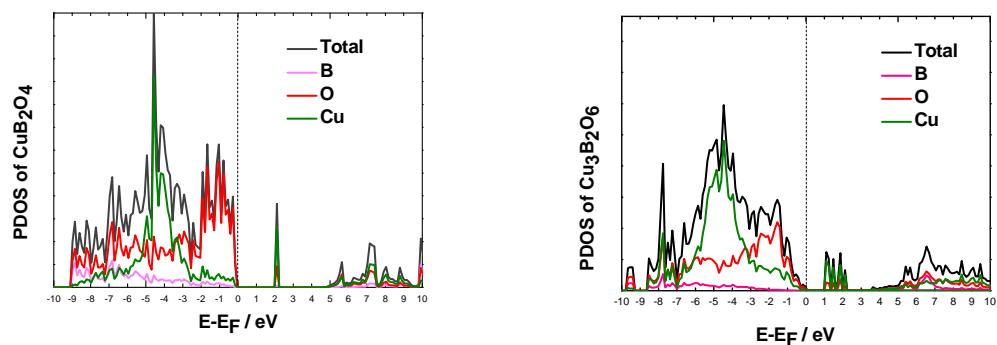

**Figure S8:** LSDA+U PDOS in antiferromagnetically ordered ground state.  $U(\text{Cu})=7.5$  eV,  $J(\text{Cu})=0.98$  eV are used for both  $\text{CuB}_2\text{O}_4$  and  $\text{Cu}_3\text{B}_2\text{O}_6$ .

## References:

- (1) A. Anantharamulu, V. B. Kumar, R. V. Devi, T. Sarojini, C. Anjaneyulu and M. Vithal, *Bull. Mater. Sci.* 2009, 32, 421.
- (2) A. Fukaya, I. Watanabe and K. Nagamine, *J. Phy. Soc. Jpn.* 2001, 70, 2868.
- (3) Y. Inoue, O. Hayashi and K. Sato, *J. Chem. Soc., Faraday Trans.* 1990, 86, 2277-2282.
- (4) X. Wang, K. Maeda, A. Thomas, K. Takanabe, G. Xin, J. M. Carlsson, K. Domen and M. Antonietti, *Nature Materials* 2009, 8, 76-80.
- (5) G. Kresse and J. Furthmuller, *Phys. Rev. B* 1996, 54, 11169-11186.
- (6) G. Kresse and D. Joubert, *Phys. Rev. B* 1999, 59, 1758-1775.
- (7) (a) V. I. Anisimov, J. Zaanen and O. K. Andersen, *Phys. Rev. B* 1991, 44, 943-954; (b) S. L. Dudarev, G. A. Botton, S. Y. Savrasov, C. J. Humphreys and A. P. Sutton, *Phys. Rev. B* 1998, 57, 1505-1509.
